# Supplementary material for: A New Measure for Serious Games Evaluation: Gaming Educational Balanced (GEB) Model
Source: MDPI journal article supplement (doi:10.3390/app122211757), 2022-11-19
Supplement: s1 [file s1]

Archive with 3 entries (3 files):
- GEB supplementary material.xlsx
- Supplementary File S1.pdf
- Supplementary File S2.pdf
