# Supplementary material for: A New Measure for Serious Games Evaluation: Gaming Educational Balanced (GEB) Model
Source: MDPI journal article supplement (doi:10.3390/app122211757), 2022-11-19
Supplement: s1 [file s1 › GEB supplementary material.xlsx]

## Sheet: Pruebas de correlación_HID12
	Mechanics	Dynamics	Aesthetics	Technology & UE	Instructional Strategies	MD: Backstory & Production	MD:Realism	MD: AI & Adaptivity	MD: Interaction	MD: Feedback & Debreafing	Learning & Fun	Can Learn vs. Must Learn
Mechanics	1	0.323327	0.0553258	0.180554	0.297879	0.0983425	0.235922	0.169521	0.1482	0.0596501	0.210969	0.282296
Dynamics	0.323327	1	0.517897	0.206938	0.282271	0.0111884	0.105732	0.342204	0.00156843	0.125818	0.238554	0.167369
Aesthetics	0.0553258	0.517897	1	0.30557	0.439117	0.370864	0.118923	0.379789	0.26633	0.0133637	0.495029	0.229149
Technology & UE	0.180554	0.206938	0.30557	1	0.218778	0.0973197	0.0630782	0.0507446	0.169775	0.193226	0.0439789	0.0396379
Instructional Strategies	0.297879	0.282271	0.439117	0.218778	1	0.234844	0.271933	0.00845892	0.386826	0.15556	0.290521	0.113937
MD: Backstory & Production	0.0983425	0.0111884	0.370864	0.0973197	0.234844	1	0.0974016	0.0638244	0.334383	0.0183724	0.345427	0.225024
MD:Realism	0.235922	0.105732	0.118923	0.0630782	0.271933	0.0974016	1	0.290977	0.140442	0.232924	0.107467	0.444552
MD: AI & Adaptivity	0.169521	0.342204	0.379789	0.0507446	0.00845892	0.0638244	0.290977	1	0.17619	0.388737	0.0254135	0.1011
MD: Interaction	0.1482	0.00156843	0.26633	0.169775	0.386826	0.334383	0.140442	0.17619	1	0.353703	0.233531	0.0432612
MD: Feedback & Debreafing	0.0596501	0.125818	0.0133637	0.193226	0.15556	0.0183724	0.232924	0.388737	0.353703	1	0.00754774	0.10036
Learning & Fun	0.210969	0.238554	0.495029	0.0439789	0.290521	0.345427	0.107467	0.0254135	0.233531	0.00754774	1	0.258579
Can Learn vs. Must Learn	0.282296	0.167369	0.229149	0.0396379	0.113937	0.225024	0.444552	0.1011	0.0432612	0.10036	0.258579	1

## Sheet: Pruebas de correlación_HID13
			10	2		10	2		5	2		2	2		3	2		3	2		3	2		3	2		1	2		10	2		8	2		2	10					10	10		5	10		2	10
			8	5		10	5		5	5		5	5		3	5		5	5		5	5		5	5		1	5		8	5		8	5		5	8					10	8		5	8		5	8
			8	5		10	5		5	5		5	5		3	5		1	5		3	5		5	5		1	5		8	5		5	5		5	8					10	8		5	8		5	8
			8	2		10	2		5	2		2	2		5	2		1	2		3	2		5	2		1	2		8	2		10	2		2	8					10	8		5	8		2	8
			8	2		8	2		8	2		5	2		1	2		1	2		1	2		3	2		0	2		8	2		8	2		2	8					8	8		8	8		5	8
			8	5		10	5		8	5		5	5		3	5		3	5		5	5		3	5		1	5		5	5		5	5		5	8					10	8		8	8		5	8
			5	2		8	2		5	2		5	2		3	2		3	2		1	2		1	2		1	2		5	2		5	2		2	5					8	5		5	5		5	5
			5	2		10	2		8	2		5	2		5	2		3	2		1	2		3	2		0	2		8	2		5	2		2	5					10	5		8	5		5	5
			8	5		10	5		5	5		8	5		3	5		1	5		1	5		5	5		1	5		5	5		10	5		5	8					10	8		5	8		8	8
			8	5		8	5		5	5		2	5		5	5		1	5		3	5		5	5		1	5		5	5		5	5		5	8					8	8		5	8		2	8
			10	2		10	2		5	2		5	2		3	2		3	2		1	2		3	2		1	2		8	2		8	2		2	10					10	10		5	10		5	10
			8	5		10	5		2	5		2	5		1	5		1	5		3	5		3	5		0	5		8	5		5	5		5	8					10	8		2	8		2	8
			8	5		10	5		5	5		5	5		3	5		1	5		1	5		3	5		1	5		8	5		5	5		5	8					10	8		5	8		5	8
			5	2		5	2		5	2		2	2		3	2		3	2		1	2		3	2		1	2		8	2		10	2		2	5					5	5		5	5		2	5
			5	5		2	5		5	5		2	5		1	5		1	5		0	5		3	5		0	5		2	5		5	5		5	5					2	5		5	5		2	5
			5	2		5	2		5	2		2	2		3	2		1	2		1	2		3	2		0	2		5	2		5	2		2	5					5	5		5	5		2	5
			5	5		0	5		2	5		2	5		3	5		1	5		1	5		3	5		1	5		2	5		2	5		5	5					0	5		2	5		2	5
			8	5		5	5		5	5		5	5		3	5		1	5		1	5		3	5		1	5		5	5		8	5		5	8					5	8		5	8		5	8
			5	5		10	5		8	5		5	5		5	5		5	5		3	5		5	5		5	5		8	5		8	5		5	5					10	5		8	5		5	5
			2	2		2	2		2	2		0	2		1	2		5	2		1	2		3	2		1	2		5	2		5	2		2	2					2	2		2	2		0	2
			5	0		5	0		2	0		2	0		3	0		1	0		0	0		3	0		0	0		8	0		5	0		0	5					5	5		2	5		2	5
			8	5		10	5		8	5		2	5		3	5		3	5		1	5		3	5		0	5		2	5		5	5		5	8					10	8		8	8		2	8
			2	2		5	2		5	2		2	2		3	2		3	2		1	2		3	2		1	2		5	2		8	2		2	2					5	2		5	2		2	2
			5	5		2	5		8	5		0	5		3	5		3	5		0	5		3	5		0	5		8	5		8	5		5	5					2	5		8	5		0	5
			5	2		8	2		5	2		2	2		3	2		3	2		1	2		3	2		0	2		10	2		10	2		2	5					8	5		5	5		2	5
			5	2		5	2		5	2		2	2		1	2		3	2		1	2		3	2		1	2		2	2		8	2		2	5					5	5		5	5		2	5
			8	5		8	5		8	5		5	5		1	5		1	5		1	5		5	5		1	5		8	5		0	5		5	8					8	8		8	8		5	8
			5	2		5	2		5	2		5	2		5	2		1	2		0	2		5	2		0	2		5	2		0	2		2	5					5	5		5	5		5	5
			8	2		2	2		8	2		2	2		0	2		1	2		3	2		3	2		3	2		2	2		5	2		2	8					2	8		8	8		2	8
			2	5		5	5		5	5		5	5		1	5		1	5		3	5		5	5		3	5		2	5		5	5		5	2					5	2		5	2		5	2
			8	8		5	8		5	8		8	8		3	8		1	8		1	8		5	8		1	8		8	8		5	8		8	8					5	8		5	8		8	8
			8	8		5	8		5	8		2	8		1	8		3	8		3	8		3	8		1	8		2	8		2	8		8	8					5	8		5	8		2	8
			2	5		5	5		5	5		2	5		3	5		0	5		1	5		3	5		0	5		2	5		0	5		5	2					5	2		5	2		2	2
			2	2		5	2		5	2		5	2		3	2		1	2		1	2		5	2		3	2		10	2		2	2		2	2					5	2		5	2		5	2
			8	8		10	8		8	8		8	8		5	8		0	8		0	8		5	8		1	8		8	8		5	8		8	8					10	8		8	8		8	8
			8	8		5	8		5	8		5	8		1	8		0	8		1	8		1	8		0	8		5	8		2	8		8	8					5	8		5	8		5	8
			8	5		8	5		5	5		5	5		1	5		1	5		3	5		3	5		1	5		8	5		0	5		5	8					8	8		5	8		5	8
			5	5		8	5		8	5		2	5		1	5		1	5		1	5		5	5		1	5		5	5		2	5		5	5					8	5		8	5		2	5
			5	2		8	2		5	2		8	2		3	2		1	2		1	2		5	2		0	2		8	2		2	2		2	5					8	5		5	5		8	5

## Sheet: Pruebas de correlación_HID14
0	0	2	0	0	0	2	0	0	0	0	0	0	0	0	0	1	0	0	0	2	0	0	0
0	1	2	5	0	1	2	4	0	2	0	1	0	3	0	5	1	2	0	13	2	8	0	4
0.81	1	2.81	5	1.1	1	2.61	4	0.81	2	0.51	1	0.51	3	0.51	5	1.41	2	0.51	13	2.81	8	1.1	4
0.81	0	2.81	0	1.1	0	2.61	0	0.81	0	0.51	0	0.51	0	0.51	0	1.41	0	0.51	0	2.81	0	1.1	0
0.81	0	2.81	0	1.1	4	2.61	0	0.81	0	0.51	11	0.51	21	0.51	22	1.41	0	0.51	22	2.81	0	1.1	6
1.62	0	3.62	0	2.2	4	3.22	0	1.62	0	1.02	11	1.02	21	1.02	22	1.82	0	1.02	22	3.62	0	2.2	6
1.62	0	3.62	0	2.2	0	3.22	0	1.62	0	1.02	0	1.02	0	1.02	0	1.82	0	1.02	0	3.62	0	2.2	0
1.62	16	3.62	0	2.2	0	3.22	0	1.62	17	1.02	0	1.02	0	1.02	0	1.82	0	1.02	0	3.62	0	2.2	0
2.43	16	4.43	0	3.3	0	3.83	0	2.43	17	1.53	0	1.53	0	1.53	0	2.23	0	1.53	0	4.43	0	3.3	0
2.43	0	4.43	0	3.3	0	3.83	0	2.43	0	1.53	0	1.53	0	1.53	0	2.23	0	1.53	0	4.43	0	3.3	0
2.43	0	4.43	14	3.3	0	3.83	0	2.43	0	1.53	0	1.53	0	1.53	0	2.23	0	1.53	0	4.43	11	3.3	0
3.24	0	5.24	14	4.4	0	4.44	0	3.24	0	2.04	0	2.04	0	2.04	0	2.64	0	2.04	0	5.24	11	4.4	0
3.24	0	5.24	0	4.4	0	4.44	0	3.24	0	2.04	0	2.04	0	2.04	0	2.64	0	2.04	0	5.24	0	4.4	0
3.24	0	5.24	0	4.4	13	4.44	25	3.24	0	2.04	0	2.04	0	2.04	0	2.64	23	2.04	0	5.24	0	4.4	16
4.05	0	6.05	0	5.5	13	5.05	25	4.05	0	2.55	0	2.55	0	2.55	0	3.05	23	2.55	0	6.05	0	5.5	16
4.05	0	6.05	0	5.5	0	5.05	0	4.05	0	2.55	0	2.55	0	2.55	0	3.05	0	2.55	0	6.05	0	5.5	0
4.05	0	6.05	0	5.5	0	5.05	0	4.05	0	2.55	21	2.55	12	2.55	10	3.05	0	2.55	3	6.05	0	5.5	0
4.86	0	6.86	0	6.6	0	5.66	0	4.86	0	3.06	21	3.06	12	3.06	10	3.46	0	3.06	3	6.86	0	6.6	0
4.86	0	6.86	0	6.6	0	5.66	0	4.86	0	3.06	0	3.06	0	3.06	0	3.46	0	3.06	0	6.86	0	6.6	0
4.86	18	6.86	0	6.6	0	5.66	0	4.86	16	3.06	0	3.06	0	3.06	0	3.46	0	3.06	0	6.86	0	6.6	0
5.67	18	7.67	0	7.7	0	6.27	0	5.67	16	3.57	0	3.57	0	3.57	0	3.87	0	3.57	0	7.67	0	7.7	0
5.67	0	7.67	0	7.7	0	6.27	0	5.67	0	3.57	0	3.57	0	3.57	0	3.87	0	3.57	0	7.67	0	7.7	0
5.67	0	7.67	18	7.7	8	6.27	0	5.67	0	3.57	0	3.57	0	3.57	0	3.87	0	3.57	0	7.67	17	7.7	9
6.48	0	8.48	18	8.8	8	6.88	0	6.48	0	4.08	0	4.08	0	4.08	0	4.28	0	4.08	0	8.48	17	8.8	9
6.48	0	8.48	0	8.8	0	6.88	0	6.48	0	4.08	0	4.08	0	4.08	0	4.28	0	4.08	0	8.48	0	8.8	0
6.48	0	8.48	0	8.8	0	6.88	0	6.48	0	4.08	0	4.08	0	4.08	0	4.28	0	4.08	0	8.48	0	8.8	0
7.29	0	9.29	0	9.9	0	7.49	0	7.29	0	4.59	0	4.59	0	4.59	0	4.69	0	4.59	0	9.29	0	9.9	0
7.29	0	9.29	0	9.9	0	7.49	0	7.29	0	4.59	0	4.59	0	4.59	0	4.69	0	4.59	0	9.29	0	9.9	0
7.29	4	9.29	2	9.9	13	7.49	10	7.29	4	4.59	6	4.59	3	4.59	2	4.69	14	4.59	1	9.29	3	9.9	4
8.1	4	10.1	2	11	13	8.1	10	8.1	4	5.1	6	5.1	3	5.1	2	5.1	14	5.1	1	10.1	3	11	4
8.1	0	10.1	0	11	0	8.1	0	8.1	0	5.1	0	5.1	0	5.1	0	5.1	0	5.1	0	10.1	0	11	0

## Sheet: Pruebas de correlación_HID15
3	3		3	3		1	3		10	3		8	3		2	3		10	3		10	3		5	3		2	3		3	3		3	3					3	3		1	3		10	3		8	3
5	5		5	5		1	5		8	5		8	5		5	5		8	5		10	5		5	5		5	5		3	5		5	5					5	5		1	5		8	5		8	5
3	1		5	1		1	1		8	1		5	1		5	3		8	3		10	3		5	3		5	3		3	3		1	3					5	3		1	3		8	3		5	3
3	1		5	1		1	1		8	1		10	1		2	3		8	3		10	3		5	3		2	3		5	3		1	3					5	3		1	3		8	3		10	3
1	1		3	1		0	1		8	1		8	1		2	1		8	1		8	1		8	1		5	1		1	1		1	1					3	1		0	1		8	1		8	1
5	3		3	3		1	3		5	3		5	3		5	5		8	5		10	5		8	5		5	5		3	5		3	5					3	5		1	5		5	5		5	5
1	3		1	3		1	3		5	3		5	3		2	1		5	1		8	1		5	1		5	1		3	1		3	1					1	1		1	1		5	1		5	1
1	3		3	3		0	3		8	3		5	3		2	1		5	1		10	1		8	1		5	1		5	1		3	1					3	1		0	1		8	1		5	1
1	1		5	1		1	1		5	1		10	1		5	1		8	1		10	1		5	1		8	1		3	1		1	1					5	1		1	1		5	1		10	1
3	1		5	1		1	1		5	1		5	1		5	3		8	3		8	3		5	3		2	3		5	3		1	3					5	3		1	3		5	3		5	3
1	3		3	3		1	3		8	3		8	3		2	1		10	1		10	1		5	1		5	1		3	1		3	1					3	1		1	1		8	1		8	1
3	1		3	1		0	1		8	1		5	1		5	3		8	3		10	3		2	3		2	3		1	3		1	3					3	3		0	3		8	3		5	3
1	1		3	1		1	1		8	1		5	1		5	1		8	1		10	1		5	1		5	1		3	1		1	1					3	1		1	1		8	1		5	1
1	3		3	3		1	3		8	3		10	3		2	1		5	1		5	1		5	1		2	1		3	1		3	1					3	1		1	1		8	1		10	1
0	1		3	1		0	1		2	1		5	1		5	0		5	0		2	0		5	0		2	0		1	0		1	0					3	0		0	0		2	0		5	0
1	1		3	1		0	1		5	1		5	1		2	1		5	1		5	1		5	1		2	1		3	1		1	1					3	1		0	1		5	1		5	1
1	1		3	1		1	1		2	1		2	1		5	1		5	1		0	1		2	1		2	1		3	1		1	1					3	1		1	1		2	1		2	1
1	1		3	1		1	1		5	1		8	1		5	1		8	1		5	1		5	1		5	1		3	1		1	1					3	1		1	1		5	1		8	1
3	5		5	5		5	5		8	5		8	5		5	3		5	3		10	3		8	3		5	3		5	3		5	3					5	3		5	3		8	3		8	3
1	5		3	5		1	5		5	5		5	5		2	1		2	1		2	1		2	1		0	1		1	1		5	1					3	1		1	1		5	1		5	1
0	1		3	1		0	1		8	1		5	1		0	0		5	0		5	0		2	0		2	0		3	0		1	0					3	0		0	0		8	0		5	0
1	3		3	3		0	3		2	3		5	3		5	1		8	1		10	1		8	1		2	1		3	1		3	1					3	1		0	1		2	1		5	1
1	3		3	3		1	3		5	3		8	3		2	1		2	1		5	1		5	1		2	1		3	1		3	1					3	1		1	1		5	1		8	1
0	3		3	3		0	3		8	3		8	3		5	0		5	0		2	0		8	0		0	0		3	0		3	0					3	0		0	0		8	0		8	0
1	3		3	3		0	3		10	3		10	3		2	1		5	1		8	1		5	1		2	1		3	1		3	1					3	1		0	1		10	1		10	1
1	3		3	3		1	3		2	3		8	3		2	1		5	1		5	1		5	1		2	1		1	1		3	1					3	1		1	1		2	1		8	1
1	1		5	1		1	1		8	1		0	1		5	1		8	1		8	1		8	1		5	1		1	1		1	1					5	1		1	1		8	1		0	1
0	1		5	1		0	1		5	1		0	1		2	0		5	0		5	0		5	0		5	0		5	0		1	0					5	0		0	0		5	0		0	0
3	1		3	1		3	1		2	1		5	1		2	3		8	3		2	3		8	3		2	3		0	3		1	3					3	3		3	3		2	3		5	3
3	1		5	1		3	1		2	1		5	1		5	3		2	3		5	3		5	3		5	3		1	3		1	3					5	3		3	3		2	3		5	3
1	1		5	1		1	1		8	1		5	1		8	1		8	1		5	1		5	1		8	1		3	1		1	1					5	1		1	1		8	1		5	1
3	3		3	3		1	3		2	3		2	3		8	3		8	3		5	3		5	3		2	3		1	3		3	3					3	3		1	3		2	3		2	3
1	0		3	0		0	0		2	0		0	0		5	1		2	1		5	1		5	1		2	1		3	1		0	1					3	1		0	1		2	1		0	1
1	1		5	1		3	1		10	1		2	1		2	1		2	1		5	1		5	1		5	1		3	1		1	1					5	1		3	1		10	1		2	1
0	0		5	0		1	0		8	0		5	0		8	0		8	0		10	0		8	0		8	0		5	0		0	0					5	0		1	0		8	0		5	0
1	0		1	0		0	0		5	0		2	0		8	1		8	1		5	1		5	1		5	1		1	1		0	1					1	1		0	1		5	1		2	1
3	1		3	1		1	1		8	1		0	1		5	3		8	3		8	3		5	3		5	3		1	3		1	3					3	3		1	3		8	3		0	3
1	1		5	1		1	1		5	1		2	1		5	1		5	1		8	1		8	1		2	1		1	1		1	1					5	1		1	1		5	1		2	1
1	1		5	1		0	1		8	1		2	1		2	1		5	1		8	1		5	1		8	1		3	1		1	1					5	1		0	1		8	1		2	1

## Sheet: Pruebas de correlación1_HID4
	Mechanics	Dynamics	Aesthetics	Technology & UE	Instructional Strategies	MD: Backstory & Production	MD:Realism	MD: AI & Adaptivity	MD: Interaction	MD: Feedback & Debreafing	Learning & Fun	Can Learn vs. Must Learn
Mechanics	1	0.118203	0.225374	0.311805	0.164957	0.135015	0.18712	0.460566	0.470317	0.225374	0.353874	0.306408
Dynamics	0.118203	1	0.32967	0.276423	0.233982	0.253069	0.0796258	0.256648	0.326609	0.32967	0.397822	0.434622
Aesthetics	0.225374	0.32967	1	0.184466	0.09759	0.0684653	0.177123	0.272475	0.278243	0.133333	0.427618	0.195776
Technology & UE	0.311805	0.276423	0.184466	1	0.36647	0.198464	0.210042	0.0769322	0.146647	0.184466	0.133816	0.0286619
Instructional Strategies	0.164957	0.233982	0.09759	0.36647	1	0.167038	0.129641	0.356127	0.0169711	0.09759	0.365148	0.143293
MD: Backstory & Production	0.135015	0.253069	0.0684653	0.198464	0.167038	1	0.0909509	0.0533002	0.34925	0.365148	0.176882	0.0198575
MD:Realism	0.18712	0.0796258	0.177123	0.210042	0.129641	0.0909509	1	0.361961	0.231015	0.177123	0.106511	0.00963232
MD: AI & Adaptivity	0.460566	0.256648	0.272475	0.0769322	0.356127	0.0533002	0.361961	1	0.39261	0.272475	0.00520156	0.0677383
MD: Interaction	0.470317	0.326609	0.278243	0.146647	0.0169711	0.34925	0.231015	0.39261	1	0.278243	0.00619697	0.408549
MD: Feedback & Debreafing	0.225374	0.32967	0.133333	0.184466	0.09759	0.365148	0.177123	0.272475	0.278243	1	0.267261	0.195776
Learning & Fun	0.353874	0.397822	0.427618	0.133816	0.365148	0.176882	0.106511	0.00520156	0.00619697	0.267261	1	0.199603
Can Learn vs. Must Learn	0.306408	0.434622	0.195776	0.0286619	0.143293	0.0198575	0.00963232	0.0677383	0.408549	0.195776	0.199603	1

## Sheet: Pruebas de correlación1_HID5
			10	2		10	2		5	2		2	2		3	2		3	2		3	2		3	2		1	2		10	2		8	2		2	10					10	10		5	10		2	10
			8	5		10	5		5	5		5	5		3	5		5	5		5	5		5	5		1	5		8	5		8	5		5	8					10	8		5	8		5	8
			8	5		10	5		5	5		5	5		3	5		1	5		3	5		5	5		1	5		8	5		5	5		5	8					10	8		5	8		5	8
			8	2		10	2		5	2		2	2		5	2		1	2		3	2		5	2		1	2		8	2		10	2		2	8					10	8		5	8		2	8
			8	2		8	2		8	2		5	2		1	2		1	2		1	2		3	2		0	2		8	2		8	2		2	8					8	8		8	8		5	8
			8	5		10	5		8	5		5	5		3	5		3	5		5	5		3	5		1	5		5	5		5	5		5	8					10	8		8	8		5	8
			5	2		8	2		5	2		5	2		3	2		3	2		1	2		1	2		1	2		5	2		5	2		2	5					8	5		5	5		5	5
			5	2		10	2		8	2		5	2		5	2		3	2		1	2		3	2		0	2		8	2		5	2		2	5					10	5		8	5		5	5
			8	5		10	5		5	5		8	5		3	5		1	5		1	5		5	5		1	5		5	5		10	5		5	8					10	8		5	8		8	8
			8	5		8	5		5	5		2	5		5	5		1	5		3	5		5	5		1	5		5	5		5	5		5	8					8	8		5	8		2	8
			10	2		10	2		5	2		5	2		3	2		3	2		1	2		3	2		1	2		8	2		8	2		2	10					10	10		5	10		5	10
			8	5		10	5		2	5		2	5		1	5		1	5		3	5		3	5		0	5		8	5		5	5		5	8					10	8		2	8		2	8
			8	5		10	5		5	5		5	5		3	5		1	5		1	5		3	5		1	5		8	5		5	5		5	8					10	8		5	8		5	8

## Sheet: Pruebas de correlación1_HID6
2	0	5	0	8	0	2	0	2	0	1	0	1	0	1	0	1	0	0	0	5	0	5	0
2	6	5	2	8	3	2	1	2	4	1	2	1	7	1	6	1	1	0	3	5	4	5	7
2.31	6	5.51	2	8.21	3	2.61	1	2.61	4	1.41	2	1.41	7	1.41	6	1.41	1	0.11	3	5.51	4	5.51	7
2.31	0	5.51	0	8.21	0	2.61	0	2.61	0	1.41	0	1.41	0	1.41	0	1.41	0	0.11	0	5.51	0	5.51	0
2.31	0	5.51	0	8.21	0	2.61	0	2.61	0	1.41	0	1.41	0	1.41	0	1.41	0	0.11	0	5.51	0	5.51	0
2.62	0	6.02	0	8.42	0	3.22	0	3.22	0	1.82	0	1.82	0	1.82	0	1.82	0	0.22	0	6.02	0	6.02	0
2.62	0	6.02	0	8.42	0	3.22	0	3.22	0	1.82	0	1.82	0	1.82	0	1.82	0	0.22	0	6.02	0	6.02	0
2.62	0	6.02	0	8.42	0	3.22	0	3.22	0	1.82	0	1.82	0	1.82	0	1.82	0	0.22	0	6.02	0	6.02	0
2.93	0	6.53	0	8.63	0	3.83	0	3.83	0	2.23	0	2.23	0	2.23	0	2.23	0	0.33	0	6.53	0	6.53	0
2.93	0	6.53	0	8.63	0	3.83	0	3.83	0	2.23	0	2.23	0	2.23	0	2.23	0	0.33	0	6.53	0	6.53	0
2.93	0	6.53	0	8.63	0	3.83	0	3.83	0	2.23	0	2.23	0	2.23	0	2.23	0	0.33	0	6.53	0	6.53	0
3.24	0	7.04	0	8.84	0	4.44	0	4.44	0	2.64	0	2.64	0	2.64	0	2.64	0	0.44	0	7.04	0	7.04	0
3.24	0	7.04	0	8.84	0	4.44	0	4.44	0	2.64	0	2.64	0	2.64	0	2.64	0	0.44	0	7.04	0	7.04	0
3.24	0	7.04	0	8.84	0	4.44	9	4.44	8	2.64	8	2.64	5	2.64	5	2.64	7	0.44	0	7.04	0	7.04	0
3.55	0	7.55	0	9.05	0	5.05	9	5.05	8	3.05	8	3.05	5	3.05	5	3.05	7	0.55	0	7.55	0	7.55	0
3.55	0	7.55	0	9.05	0	5.05	0	5.05	0	3.05	0	3.05	0	3.05	0	3.05	0	0.55	0	7.55	0	7.55	0
3.55	0	7.55	9	9.05	0	5.05	0	5.05	0	3.05	0	3.05	0	3.05	0	3.05	0	0.55	0	7.55	8	7.55	4
3.86	0	8.06	9	9.26	0	5.66	0	5.66	0	3.46	0	3.46	0	3.46	0	3.46	0	0.66	0	8.06	8	8.06	4
3.86	0	8.06	0	9.26	0	5.66	0	5.66	0	3.46	0	3.46	0	3.46	0	3.46	0	0.66	0	8.06	0	8.06	0
3.86	0	8.06	0	9.26	0	5.66	0	5.66	0	3.46	0	3.46	0	3.46	0	3.46	0	0.66	0	8.06	0	8.06	0
4.17	0	8.57	0	9.47	0	6.27	0	6.27	0	3.87	0	3.87	0	3.87	0	3.87	0	0.77	0	8.57	0	8.57	0
4.17	0	8.57	0	9.47	0	6.27	0	6.27	0	3.87	0	3.87	0	3.87	0	3.87	0	0.77	0	8.57	0	8.57	0
4.17	0	8.57	0	9.47	0	6.27	0	6.27	0	3.87	0	3.87	0	3.87	0	3.87	0	0.77	0	8.57	0	8.57	0
4.48	0	9.08	0	9.68	0	6.88	0	6.88	0	4.28	0	4.28	0	4.28	0	4.28	0	0.88	0	9.08	0	9.08	0
4.48	0	9.08	0	9.68	0	6.88	0	6.88	0	4.28	0	4.28	0	4.28	0	4.28	0	0.88	0	9.08	0	9.08	0
4.48	0	9.08	0	9.68	0	6.88	0	6.88	0	4.28	0	4.28	0	4.28	0	4.28	0	0.88	0	9.08	0	9.08	0
4.79	0	9.59	0	9.89	0	7.49	0	7.49	0	4.69	0	4.69	0	4.69	0	4.69	0	0.99	0	9.59	0	9.59	0
4.79	0	9.59	0	9.89	0	7.49	0	7.49	0	4.69	0	4.69	0	4.69	0	4.69	0	0.99	0	9.59	0	9.59	0
4.79	7	9.59	2	9.89	10	7.49	3	7.49	1	4.69	3	4.69	1	4.69	2	4.69	5	0.99	10	9.59	1	9.59	2
5.1	7	10.1	2	10.1	10	8.1	3	8.1	1	5.1	3	5.1	1	5.1	2	5.1	5	1.1	10	10.1	1	10.1	2
5.1	0	10.1	0	10.1	0	8.1	0	8.1	0	5.1	0	5.1	0	5.1	0	5.1	0	1.1	0	10.1	0	10.1	0

## Sheet: Pruebas de correlación1_HID7
3	3		3	3		1	3		10	3		8	3		2	3		10	3		10	3		5	3		2	3		3	3		3	3					3	3		1	3		10	3		8	3
5	5		5	5		1	5		8	5		8	5		5	5		8	5		10	5		5	5		5	5		3	5		5	5					5	5		1	5		8	5		8	5
3	1		5	1		1	1		8	1		5	1		5	3		8	3		10	3		5	3		5	3		3	3		1	3					5	3		1	3		8	3		5	3
3	1		5	1		1	1		8	1		10	1		2	3		8	3		10	3		5	3		2	3		5	3		1	3					5	3		1	3		8	3		10	3
1	1		3	1		0	1		8	1		8	1		2	1		8	1		8	1		8	1		5	1		1	1		1	1					3	1		0	1		8	1		8	1
5	3		3	3		1	3		5	3		5	3		5	5		8	5		10	5		8	5		5	5		3	5		3	5					3	5		1	5		5	5		5	5
1	3		1	3		1	3		5	3		5	3		2	1		5	1		8	1		5	1		5	1		3	1		3	1					1	1		1	1		5	1		5	1
1	3		3	3		0	3		8	3		5	3		2	1		5	1		10	1		8	1		5	1		5	1		3	1					3	1		0	1		8	1		5	1
1	1		5	1		1	1		5	1		10	1		5	1		8	1		10	1		5	1		8	1		3	1		1	1					5	1		1	1		5	1		10	1
3	1		5	1		1	1		5	1		5	1		5	3		8	3		8	3		5	3		2	3		5	3		1	3					5	3		1	3		5	3		5	3
1	3		3	3		1	3		8	3		8	3		2	1		10	1		10	1		5	1		5	1		3	1		3	1					3	1		1	1		8	1		8	1
3	1		3	1		0	1		8	1		5	1		5	3		8	3		10	3		2	3		2	3		1	3		1	3					3	3		0	3		8	3		5	3
1	1		3	1		1	1		8	1		5	1		5	1		8	1		10	1		5	1		5	1		3	1		1	1					3	1		1	1		8	1		5	1

## Sheet: Pruebas de correlación_HID8
	Mechanics	Dynamics	Aesthetics	Technology & UE	Instructional Strategies	MD: Backstory & Production	MD:Realism	MD: AI & Adaptivity	MD: Interaction	MD: Feedback & Debreafing
Mechanics	1	0.118203	0.225374	0.311805	0.164957	0.135015	0.18712	0.460566	0.470317	0.225374
Dynamics	0.118203	1	0.32967	0.276423	0.233982	0.253069	0.0796258	0.256648	0.326609	0.32967
Aesthetics	0.225374	0.32967	1	0.184466	0.09759	0.0684653	0.177123	0.272475	0.278243	0.133333
Technology & UE	0.311805	0.276423	0.184466	1	0.36647	0.198464	0.210042	0.0769322	0.146647	0.184466
Instructional Strategies	0.164957	0.233982	0.09759	0.36647	1	0.167038	0.129641	0.356127	0.0169711	0.09759
MD: Backstory & Production	0.135015	0.253069	0.0684653	0.198464	0.167038	1	0.0909509	0.0533002	0.34925	0.365148
MD:Realism	0.18712	0.0796258	0.177123	0.210042	0.129641	0.0909509	1	0.361961	0.231015	0.177123
MD: AI & Adaptivity	0.460566	0.256648	0.272475	0.0769322	0.356127	0.0533002	0.361961	1	0.39261	0.272475
MD: Interaction	0.470317	0.326609	0.278243	0.146647	0.0169711	0.34925	0.231015	0.39261	1	0.278243
MD: Feedback & Debreafing	0.225374	0.32967	0.133333	0.184466	0.09759	0.365148	0.177123	0.272475	0.278243	1

## Sheet: Pruebas de correlación_HID9
			10	2		10	2		5	2		2	2		3	2		3	2		3	2		3	2		1	2		2	10					10	10		5	10		2	10		3	10		3	10
			8	5		10	5		5	5		5	5		3	5		5	5		5	5		5	5		1	5		5	8					10	8		5	8		5	8		3	8		5	8
			8	5		10	5		5	5		5	5		3	5		1	5		3	5		5	5		1	5		5	8					10	8		5	8		5	8		3	8		1	8
			8	2		10	2		5	2		2	2		5	2		1	2		3	2		5	2		1	2		2	8					10	8		5	8		2	8		5	8		1	8
			8	2		8	2		8	2		5	2		1	2		1	2		1	2		3	2		0	2		2	8					8	8		8	8		5	8		1	8		1	8
			8	5		10	5		8	5		5	5		3	5		3	5		5	5		3	5		1	5		5	8					10	8		8	8		5	8		3	8		3	8
			5	2		8	2		5	2		5	2		3	2		3	2		1	2		1	2		1	2		2	5					8	5		5	5		5	5		3	5		3	5
			5	2		10	2		8	2		5	2		5	2		3	2		1	2		3	2		0	2		2	5					10	5		8	5		5	5		5	5		3	5
			8	5		10	5		5	5		8	5		3	5		1	5		1	5		5	5		1	5		5	8					10	8		5	8		8	8		3	8		1	8
			8	5		8	5		5	5		2	5		5	5		1	5		3	5		5	5		1	5		5	8					8	8		5	8		2	8		5	8		1	8
			10	2		10	2		5	2		5	2		3	2		3	2		1	2		3	2		1	2		2	10					10	10		5	10		5	10		3	10		3	10
			8	5		10	5		2	5		2	5		1	5		1	5		3	5		3	5		0	5		5	8					10	8		2	8		2	8		1	8		1	8
			8	5		10	5		5	5		5	5		3	5		1	5		1	5		3	5		1	5		5	8					10	8		5	8		5	8		3	8		1	8

[truncated: 76 more sheets: Pruebas de correlación_HID10, Pruebas de correlación_HID11, Pruebas de correlación2_HID4, Pruebas de correlación2_HID5, Pruebas de correlación2_HID6, Pruebas de correlación2_HID7, Pruebas de correlación1_HID, Pruebas de correlación1_HID1, Pruebas de correlación1_HID2, Pruebas de correlación1_HID3, Pruebas de correlación2_HID, Pruebas de correlación2_HID1, Pruebas de correlación2_HID2, Pruebas de correlación2_HID3, Pruebas de correlación3_HID4, Pruebas de correlación3_HID5, Pruebas de correlación3_HID6, Pruebas de correlación3_HID7, Pruebas de correlación3_HID, Pruebas de correlación3_HID1 …]
